# Supplementary material for: Effectiveness of anthocyanin-containing foods and nutraceuticals in mitigating oxidative stress, inflammation, and cardiovascular health-related biomarkers: a systematic review of animal and human interventions
Source: Royal Society of Chemistry journal article supplement (doi:10.1039/d3fo04579j), 2024-01-01
Supplement: d3fo04579j1.pdf [file d3fo04579j1.pdf]

**Table 1 – Supplementary material: PICOS format used for inclusion and exclusion criteria**  
 to gather human studies.

| PICOS Format        | Inclusion criteria                                                                                                                                                                                                                                                               | Exclusion criteria                                                                                                                                                                                                          |
|---------------------|----------------------------------------------------------------------------------------------------------------------------------------------------------------------------------------------------------------------------------------------------------------------------------|-----------------------------------------------------------------------------------------------------------------------------------------------------------------------------------------------------------------------------|
| <b>Population</b>   | All participants aged 18+ were healthy or unhealthy. All sexes and races.                                                                                                                                                                                                        | Animals and cell cultures, humans under 18.                                                                                                                                                                                 |
| <b>Intervention</b> | Studies which include supplementation with food sources/extracts/capsules containing anthocyanins.<br><br>Interventions investigating the effect of anthocyanin intake on CVD and related biomarkers.                                                                            | Studies which did not include anthocyanin supplementation or investigate the effects of anthocyanin intake on CVD health and related biomarkers.                                                                            |
| <b>Comparators</b>  | Studies investigating the effects of anthocyanin intake post consumption on cardiovascular health and related biomarkers.<br><br>Studies using placebos, controls, and individuals with various health implications.<br><br>Studies comparing different dosages of anthocyanins. | Studies not unveiling the association between anthocyanin intake on CVD health and related biomarkers.                                                                                                                      |
| <b>Outcomes</b>     | Studies which resulted in changes in CVD health and related biomarkers i.e., oxidative stress and inflammation.                                                                                                                                                                  | Studies with results that did not affect CVD health the cardiovascular system or related biomarkers.                                                                                                                        |
| <b>Study design</b> | Clinical trials, randomised controlled trials (RCTs) and human intervention studies.<br><br>English language only.<br><br>Studies with $\geq 30$ individuals.                                                                                                                    | <i>In vitro</i> studies, animal studies, Meta-analysis, non-experimental studies (reviews), cohort studies, cross-sectional studies, and systematic reviews.<br><br>Non-English.<br><br>Studies with $\leq 30$ individuals. |

**Table 2 – Supplementary material:** PICOS format was used to gather animal studies for inclusion and exclusion criteria.

| Parameters                      | Inclusion Criteria                                                                                                                                                                                                                   | Exclusion Criteria                                                                                                                                                        |
|---------------------------------|--------------------------------------------------------------------------------------------------------------------------------------------------------------------------------------------------------------------------------------|---------------------------------------------------------------------------------------------------------------------------------------------------------------------------|
| <b>Population</b>               | Animals (healthy) or animals with induced type 2 diabetes, insulin resistance, obesity, atherothrombotic vascular occlusion and hypercholesterolemia.                                                                                | Cell cultures and humans. Studies using yeasts, bacteria, fungi, insects, and fish.                                                                                       |
| <b>Intervention or Exposure</b> | Studies that include anthocyanin-rich foods or supplementation of anthocyanins.                                                                                                                                                      | Studies that do not focus on the quantification of anthocyanins and the analysis of the association between anthocyanin consumption on CVD health and related biomarkers. |
| <b>Comparator</b>               | Studies that compare the biomarkers pre and post-intervention/exposure.<br><br>Placebo-controlled trials are considered.<br><br>Studies comparing different dosages of anthocyanins (at least a placebo and one anthocyanin dosage). | Trials that only include a testing group and control groups are excluded.                                                                                                 |
| <b>Outcomes</b>                 | Any difference in cardiovascular health and related biomarkers (inflammation & oxidation-related biomarkers). Blood pressure, physiology/anatomy of the cardiovascular system.                                                       | Studies which result in other results that do not affect CVD or the related biomarkers or the blood pressure, physiology/anatomy of the cardiovascular system.            |
| <b>Study Design</b>             | Experimental studies using animals. Studies reported only in English with a minimum of 5 animals per group.                                                                                                                          | Systematic review, meta-analysis, <i>in vivo</i> studies, Review papers, human studies, studies with less than 8 animals, clinical trials, randomised clinical trials     |

**Table 3 – Supplementary material:** Database search strategy used for animal studies.

|                                  |                                                                                                         |
|----------------------------------|---------------------------------------------------------------------------------------------------------|
| <b>Search terms</b>              | Anthocyanins, CVD, cardiometabolic health/ disease/risk oxidative stress, inflammation, atherosclerosis |
| <b>Databases</b>                 | EMBASE, EBSCO and Web of Science                                                                        |
| <b>Types of studies included</b> | Animal trials and placebo-controlled trials                                                             |
| <b>Inclusion criteria</b>        | English language, animal trials, studies from 2000-2022.                                                |
| <b>Exclusion criteria</b>        | Human trials, <i>in vitro</i> , systematic reviews, meta-analysis, non-English, clinical trials.        |

|                                        |                                                                                                                                                                  |                            |
|----------------------------------------|------------------------------------------------------------------------------------------------------------------------------------------------------------------|----------------------------|
| <b>Search terms</b>                    | Anthocyanins<br>AND<br>CVD OR Cardiometabolic disease OR Cardiovascular health OR<br>Cardiometabolic risk<br>Oxidative stress OR Inflammation OR Atherosclerosis | <b>Table</b><br><b>4 -</b> |
| <b>Databases</b>                       | EBSCO, EMBASE and Web of Science                                                                                                                                 | <b>Suppl</b>               |
| <b>Types of studies to be included</b> | Clinical trials, RCTs, human interventions and placebo-controlled trials.                                                                                        | <b>emen</b>                |
| <b>Inclusion criteria</b>              | English language, human studies, dating from 2000-2022                                                                                                           | <b>tary</b>                |
| <b>Exclusion criteria</b>              | <i>In vitro</i> , Animal studies, systematic reviews, meta-analysis, non-English                                                                                 | <b>mate</b>                |
|                                        |                                                                                                                                                                  | <b>rial:</b>               |
|                                        |                                                                                                                                                                  | <b>Datab</b>               |
|                                        |                                                                                                                                                                  | <b>ase</b>                 |
|                                        |                                                                                                                                                                  | <b>searc</b>               |

h strategy used for human studies.

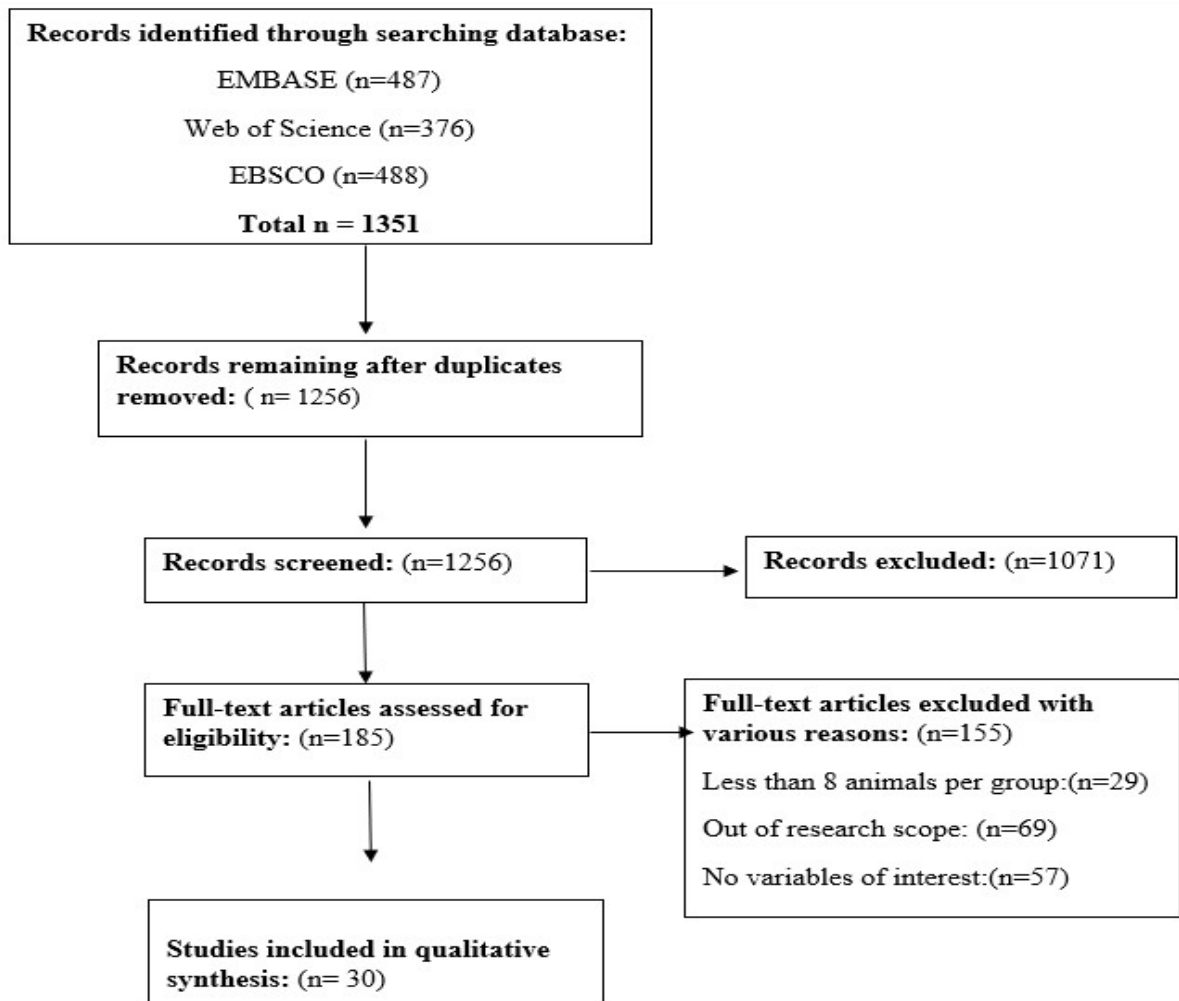

**Fig. 1 – Supplementary material:** Flow diagram depicting the study selection and screening process for animal studies.

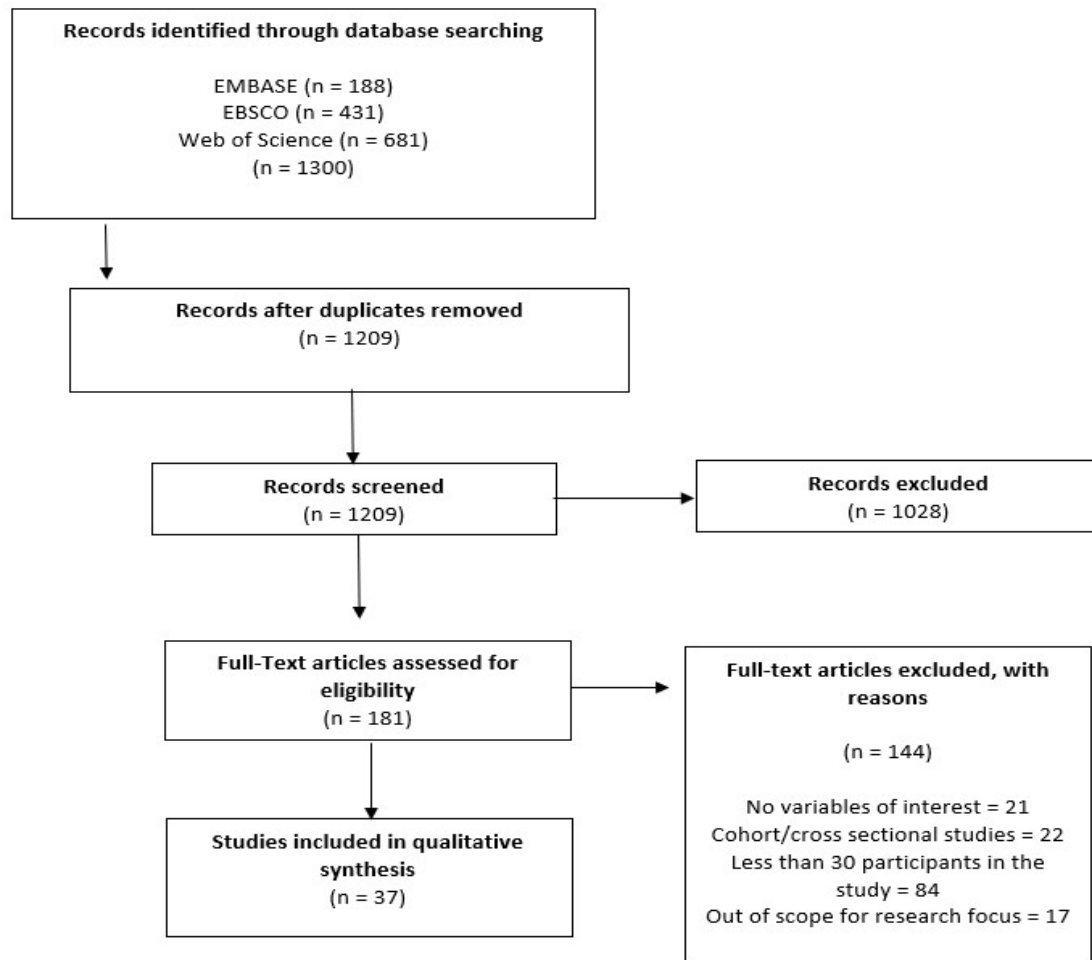

**Fig. 2 – Supplementary material:** Flow diagram depicting the study selection and screening process.
